# Supplementary material for: A size-invariant bud-duration timer enables robustness in yeast cell size control
Source: PLOS journal article supplement (doi:10.1371/journal.pone.0209301), 2018-12-21
Supplement: S4 (10.1371/journal.pone.0209301.s004) [file journal.pone.0209301.s004]

# Supplemental Experimental Procedures

## 1 Different models of growth

### 1.1 Growth proportional to surface area

We found that the radius  $r$  grows linearly with time  $t$ :

$$r(t) = at \tag{1}$$

where  $a$  is an arbitrary constant. It follows that

$$\frac{dr}{dt} = a \tag{2}$$

Ultimately, we are interested in how the volume changes over time ( $\frac{dV}{dt}$ ) to be able to compare it with known growth models. We can calculate  $\frac{dV}{dt}$  with the help of the known  $\frac{dr}{dt}$  by:

$$\frac{dV}{dt} = \frac{dr}{dt} \frac{dV}{dr} \tag{3}$$

The volume and the radius are related by the formula for the volume of a sphere  $V = \frac{4}{3}\pi r^3$ . Calculating the derivative of the volume with respect to the radius

$$\frac{dV}{dr} = 4\pi r^2 = A \tag{4}$$

results in the expression for the surface area  $A$  of a sphere. Using equations (2) and (4) in (3) leads to

$$\frac{dV}{dt} = aA \tag{5}$$

This shows that if the radius grows linearly with time, the volume always grows proportionally to the surface area. Using the formulas for the surface area and the volume of a sphere, we see that plotting surface area over time would result in a quadratic curve, while the volume depends on time to the power of 3.

### 1.2 Growth proportional to volume

For comparison, we briefly describe what growth proportional to the volume would look like. Growth proportional to volume means that

$$\frac{dV}{dt} = aV \tag{6}$$

Solving this leads to

$$\log V = at + C \tag{7}$$

where  $C$  is an arbitrary constant. Using the formula for the volume of a sphere, we can express the volume as a function of the radius:

$$\log \left( \frac{4}{3}\pi r^3 \right) = at + C \tag{8}$$

This can be rewritten as

$$\frac{4}{3}\pi r^3 = e^{at+C} \quad (9)$$

Solving for  $r$  leads to

$$r(t) = \left(\frac{3}{4\pi}\right)^{\frac{1}{3}} e^{\frac{1}{3}(at+C)} \quad (10)$$

This means that  $r$  would grow exponentially with time. The same is true for the surface area  $A$  and the volume (by using the expression for  $r$  in equation (10) in  $A = 4\pi r^2$ ,  $V = \frac{4}{3}\pi r^3$ ).

### 1.3 Constant growth

Another common model of growth is constant growth with respect to the volume, where

$$\frac{dV}{dt} = a \quad (11)$$

Solving this leads to

$$V = at + C \quad (12)$$

Including the volume as a function of radius

$$\frac{4}{3}\pi r^3 = at + C \quad (13)$$

leads to the following dependence of  $r$  on time  $t$ :

$$r(t) = \left(\frac{3(at + C)}{4\pi}\right)^{\frac{1}{3}} \quad (14)$$

This shows that in case of constant growth with respect to the volume, the radius would grow proportional to  $t^{\frac{1}{3}}$ , the surface area proportional to  $t^{\frac{2}{3}}$ , and the volume (as the name of this model says) proportional to  $t$ .
